# Supplementary material for: Speed versus endurance tradeoff in plants: Leaves with higher photosynthetic rates show stronger seasonal declines
Source: PubMed Central journal article supplement (PMC5301202; doi:10.1038/srep42085), 2017-02-10
Supplement: srep42085-s1.pdf [file srep42085-s1.pdf]

Supplementary Information for:

**Speed versus endurance tradeoff in plants: Leaves with higher photosynthetic rates show stronger seasonal declines**

Yong-Jiang Zhang, Lawren Sack, Kun-Fang Cao, Xue-Mei Wei & Nan Li

**Tables S1, S2, Figures S1, S2, S3, S4, Additional discussion on differences between two gardens, Data source references**

**Table S1** Species, geographic location and the data source for the meta-analysis of the tradeoff between photosynthetic capacity ( $A_a$ ,  $\mu\text{mol CO}_2 \text{ m}^{-2} \text{ s}^{-1}$ ) and the maintenance of  $A_a$  into the unfavorable season

| Species                             | Geographic location          | Data source                  |
|-------------------------------------|------------------------------|------------------------------|
| <b>Sites without summer drought</b> |                              |                              |
| Evergreen angiosperms               |                              |                              |
| <i>Camellia japonica</i>            | Kamigamo, Japan              | Miyazawa and Kikuzawa (2005) |
| <i>Castanopsis cuspidata</i>        | Kamigamo, Japan              | Miyazawa and Kikuzawa (2005) |
| <i>Cleyera japonica</i>             | Kamigamo, Japan              | Miyazawa and Kikuzawa (2005) |
| <i>Ilex pedunculosa</i>             | Kamigamo, Japan              | Miyazawa and Kikuzawa (2005) |
| <i>Pachysandra terminalis</i>       | Hokkaido, Japan              | Yoshie and Kawano (1986)     |
| <i>Photinia glabra</i>              | Kamigamo, Japan              | Miyazawa and Kikuzawa (2005) |
| <i>Quercus glauca</i>               | Kamigamo, Japan              | Miyazawa and Kikuzawa (2005) |
| Conifers                            |                              |                              |
| <i>Picea abies</i>                  | L ägeren, Switzerland        | Falge et al. (1996)          |
| <i>Picea glauca</i>                 | British Columbia, Canada     | Binder and Fielder (1996)    |
| <i>Pinus sylvestris</i>             | V ästoman, Sweden            | Strand et al. (2002)         |
| <i>Pinus taeda</i>                  | North Carolina, USA          | Ellsworth (2000)             |
| <i>Pinus taeda</i>                  | North Carolina, USA          | Murthy et al. (1997)         |
| <i>Pinus taeda</i>                  | Louisiana, USA               | Tang et al. (2003)           |
| <b>Sites with summer drought</b>    |                              |                              |
| Evergreen angiosperms               |                              |                              |
| <i>Arbutus unedo</i>                | Mallorca, Spain              | Gul ás et al. (2009)         |
| <i>Boscia albitrunca</i>            | Oena Mine, South Africa      | Wand et al., 1999            |
| <i>Citrus albidus</i>               | SaVall, Mallorca, Spain      | Gul ás et al. (2009)         |
| <i>Citrus albidus</i>               | Lloret, Mallorca, Spain      | Gul ás et al. (2009)         |
| <i>Citrus albidus</i>               | Puigpunyent, Mallorca, Spain | Gul ás et al. (2009)         |
| <i>Citrus monspeliensis</i>         | SaVall, Mallorca, Spain      | Gul ás et al. (2009)         |
| <i>Citrus monspeliensis</i>         | Lloret, Mallorca, Spain      | Gul ás et al. (2009)         |
| <i>Citrus monspeliensis</i>         | Puigpunyent, Mallorca, Spain | Gul ás et al. (2009)         |

|                                    |                              |                               |
|------------------------------------|------------------------------|-------------------------------|
| <i>Citissus monspeliensis</i>      | Binifaldó, Mallorca, Spain   | Gul ás et al. (2009)          |
| <i>Citissus salvifolius</i>        | Puigpunyent, Mallorca, Spain | Gul ás et al. (2009)          |
| <i>Cneorum tricoccon</i>           | Binifaldó, Mallorca, Spain   | Gul ás et al. (2009)          |
| <i>Erica multiflora</i>            | Barcelona, Spain             | Prieto et al. (2009)          |
| <i>Erica multiflora</i>            | Barcelona, Spain             | Llorens et al. (2003)         |
| <i>Euclea pseudebenus</i>          | Oena Mine, South Africa      | Wand et al. (1999)            |
| <i>Globularia alypum</i>           | Barcelona, Spain             | Prieto et al. (2009)          |
| <i>Globularia alypum</i>           | Barcelona, Spain             | Llorens et al. (2003)         |
| <i>Hypericum balearicum</i>        | Binifaldó, Mallorca, Spain   | Gul ás et al. (2009)          |
| <i>Olea europaea</i>               | SaVall, Mallorca, Spain      | Gul ás et al. (2009)          |
| <i>Olea europaea</i>               | Lloret, Mallorca, Spain      | Gul ás et al. (2009)          |
| <i>Olea europaea</i>               | Puigpunyent, Mallorca, Spain | Gul ás et al. (2009)          |
| <i>Olea europaea</i>               | Binifaldó, Mallorca, Spain   | Gul ás et al. (2009)          |
| <i>Olea europaea</i>               | Sfax, Tunisia                | Ben Ahmed et al. (2007)       |
| <i>Phillyrea latifolia</i>         | Tarragona, Spain             | Ogaya and Penuelas (2003)     |
| <i>Phillyrea latifolia</i>         | Binifaldó, Mallorca, Spain   | Gul ás et al. (2009)          |
| <i>Pistacia lentiscus</i>          | SaVall, Mallorca, Spain      | Gul ás et al. (2009)          |
| <i>Pistacia lentiscus</i>          | Lloret, Mallorca, Spain      | Gul ás et al. (2009)          |
| <i>Pistacia lentiscus</i>          | Puigpunyent, Mallorca, Spain | Gul ás et al. (2009)          |
| <i>Pistacia lentiscus</i>          | Binifaldó, Mallorca, Spain   | Gul ás et al. (2009)          |
| <i>Pistacia lentiscus</i>          | Binifaldó, Mallorca, Spain   | Flexas et al. (2001)          |
| <i>Pistacia lentiscus</i>          | SaVall, Mallorca, Spain      | Flexas et al. (2001)          |
| <i>Quercus coccifera</i>           | Puigpunyent, Mallorca, Spain | Gul ás et al. (2009)          |
| <i>Quercus coccifera</i>           | Teruel, Spain                | Baquedano and Castillo (2007) |
| <i>Quercus ilex</i>                | Puigpunyent, Mallorca, Spain | Gul ás et al. (2009)          |
| <i>Quercus ilex</i>                | Binifaldó, Mallorca, Spain   | Gul ás et al. (2009)          |
| <i>Quercus ilex</i>                | Tarragona, Spain             | Ogaya and Penuelas (2003)     |
| <i>Quercus ilex</i>                | Teruel, Spain                | Baquedano and Castillo (2007) |
| <i>Rhamnus alaternus</i>           | Lloret, Mallorca, Spain      | Gul ás et al. (2009)          |
| <i>Rhamnus alaternus</i>           | Puigpunyent, Mallorca, Spain | Gul ás et al. (2009)          |
| <i>Rhamnus ludovici-salvatoris</i> | Binifaldó, Mallorca, Spain   | Gul ás et al. (2009)          |
| <i>Schotia afra</i>                | Oena Mine, South Africa      | Wand et al. (1999)            |

|                            |                         |                               |
|----------------------------|-------------------------|-------------------------------|
| <i>Tamarix usneoides</i>   | Oena Mine, South Africa | Wand et al. (1999)            |
| <b>Conifers</b>            |                         |                               |
| <i>Juniperus phoenicea</i> | Teruel, Spain           | Baquedano and Castillo (2007) |
| <i>Juniperus thurifera</i> | Guadalajara, Spain      | Gimeno et al. (2012)          |
| <i>Pinus canariensis</i>   | Tenerife, Spain         | Peters et al. (2008)          |
| <i>Pinus halepensis</i>    | Barcelona, Spain        | Prieto et al. (2009)          |
| <i>Pinus halepensis</i>    | Hebron, Israel          | Maseyk et al. (2008)          |
| <i>Pinus halepensis</i>    | Teruel, Spain           | Baquedano and Castillo (2007) |
| <i>Pinus palustris</i>     | Georgia, USA            | Addington et al. (2004)       |
| <i>Pinus pinea</i>         | Northern Plateau, Spain | Pardos et al. (2010)          |

---

**Table S2** Cycad species studied in Xishuganbanna Tropical Botanical Garden (XTBG) and Fairylake Botanical Garden (FBG), origin and native habitats. Nomenclature, distribution and native habitats were taken from flora of China (<http://www.efloras.org/>), PlantNet (The Plant Information Network System of the Botanic Gardens Trust; <http://plantnet.rbgsyd.nsw.gov.au/>), and PACSOA (Palm and Cycad Societies of Australia; <http://www.pacsoa.org.au/>)

| Species                                          | Family     | Code | Original distribution           | Native habitat                                                                                                                             |
|--------------------------------------------------|------------|------|---------------------------------|--------------------------------------------------------------------------------------------------------------------------------------------|
| <b>XTBG</b>                                      |            |      |                                 |                                                                                                                                            |
| <i>Cycas micholitzii</i> Thiselton-Dyer.         | Cycadaceae | CM   | China, Vietnam, Laos            | Low, scrubby woodland with substantial rainfall, seasonal dry broadleaf forests at the bottom of limestone mountains, semi-shaded thickets |
| <i>C. panzhihuaensis</i> L. Zhou & S. Y. Yang    | Cycadaceae | CPa  | China                           | Valley savannas, dry closed low woodlands or shrublands                                                                                    |
| <i>C. parvula</i> S. L. Yang ex D. Y. Wang       | Cycadaceae | CP   | China                           | Valley savannas, broadleaf forests in the valleys, shrublands on slopes                                                                    |
| <i>C. sexseminifera</i> F. N. Wei                | Cycadaceae | CSe  | China, Vietnam                  | Rocky crevices in broad-leaved forests on limestone mountains                                                                              |
| <i>C. siamensis</i> Miq.                         | Cycadaceae | CSi  | China, Vietnam, Thailand, Burma | Low open woodlands, low hills, seasonal rain forests, dry forests                                                                          |
| <i>C. szechuanensis</i> W.C. Cheng & L.K. Fu     | Cycadaceae | CS   | China                           | Moist closed forest or woodlands, valley and near streams                                                                                  |
| <i>Encephalartos cupidus</i> R. A. Dyer          | Zamiaceae  | EC   | South Africa                    | Steep slopes, rocky grassland and open forests                                                                                             |
| <i>E. gratus</i> Prain                           | Zamiaceae  | EG   | Mozambique, Malawi              | Steep to precipitous slopes in gorges near streams                                                                                         |
| <i>E. hildebrandtii</i> A. Braun & Bauche        | Zamiaceae  | EH   | Kenya, Tanzania                 | Seasonally dry savanna woodlands, sandy plains and rocky hill tops                                                                         |
| <i>Zamia fischeri</i> Miq.                       | Zamiaceae  | ZFi  | Mexico                          | Understory of evergreen and cloud forests                                                                                                  |
| <i>Z. furfuracea</i> L. f.                       | Zamiaceae  | ZF   | Mexico                          | Coastal savannas, coastal sand dunes and offshore islands, can grow down to water                                                          |
| <b>FBG</b>                                       |            |      |                                 |                                                                                                                                            |
| <i>Cycas debaoensis</i> Y. C. Zhong & C. J. Chen | Cycadaceae | CD   | China                           | Moist mixed evergreen and deciduous woodlands on limestone slopes                                                                          |
| <i>C. elongata</i> (Leandri) D. Y. Wang          | Cycadaceae | CE   | Vietnam, Laos                   | Forests to open shrublands on slopes, on dry gritty soil derived from coarse siliceous granites                                            |

Table S2 continued

| Species                                        | Family     | Code | Original distribution                   | Native habitat                                                                                               |
|------------------------------------------------|------------|------|-----------------------------------------|--------------------------------------------------------------------------------------------------------------|
| <b>FBG</b>                                     |            |      |                                         |                                                                                                              |
| <i>C. fairylakea</i> D. Y. Wang                | Cycadaceae | CF   | China                                   | Moist mixed evergreen forests                                                                                |
| <i>C. panzhihuaensis</i> L. Zhou & S. Y. Yang  | Cycadaceae | CPa  | China                                   | Valley savannas, dry closed low woodlands or shrublands                                                      |
| <i>C. szechuanensis</i> W. C. Cheng & L. k. Fu | Cycadaceae | CS   | China                                   | Moist closed forests or woodlands, valley and near streams                                                   |
| <i>C. thouarsii</i> R. Br. ex Gaudich          | Cycadaceae | CT   | Madagascar, Tanzania, Mozambique        | Moist forests behind beaches                                                                                 |
| <i>Ceratozamia mexicana</i> Brongn             | Zamiaceae  | CeM  | Mexico                                  | Wet tropical lowland rainforests to drier mountainous areas                                                  |
| <i>Dioon edule</i> Lindl.                      | Zamiaceae  | DE   | Mexico                                  | Tropical dry forests                                                                                         |
| <i>D. mejiae</i> Dyer ex Eichler               | Zamiaceae  | DM   | Honduras, Nicaragua                     | Dry rocky canyons                                                                                            |
| <i>D. spinulosum</i> Dyer ex Eichl.            | Zamiaceae  | DS   | Mexico                                  | Rocky, limestone evergreen forests                                                                           |
| <i>Encephalartos ferox</i> Bertol. f.          | Zamiaceae  | EF   | South Africa, Mozambique                | Moist evergreen forest to arid dense shrublands                                                              |
| <i>E. gratus</i> Prain                         | Zamiaceae  | EG   | Mozambique, Malawi                      | Steep to precipitous slopes in gorges near streams                                                           |
| <i>Lepidozamia hopei</i> Regel                 | Zamiaceae  | LH   | Australia                               | In or near rainforests                                                                                       |
| <i>L. peroffskyana</i> Regel                   | Zamiaceae  | LP   | Australia                               | Wet sclerophyll forests or on rainforest margins, littoral rainforests or open scrubby forests               |
| <i>Macrozamia communis</i> L. A. S. Johnson    | Zamiaceae  | MC   | Australia                               | Wet to dry sclerophyll forests, mostly on old beach sands but also on shallow sandy or stony soils on ridges |
| <i>M. lucida</i> L. A. S. Johnson              | Zamiaceae  | ML   | Australia                               | Coastal wet sclerophyll forests                                                                              |
| <i>Zamia amblyphyllidia</i> D. W. Stev.        | Zamiaceae  | ZA   | Jamaica, Cuba, Porto Rico, USA, Bahamas | Moist and warm tropical grasslands and open forests                                                          |

Table S2 continued

| Species                                           | Family    | Code | Original distribution                 | Native habitat                                                                                             |
|---------------------------------------------------|-----------|------|---------------------------------------|------------------------------------------------------------------------------------------------------------|
| <b>FBG</b>                                        |           |      |                                       |                                                                                                            |
| <i>Z. floridana</i> A. DC.                        | Zamiaceae | ZFI  | USA, Cuba, Porto Rico, Dominica       | Open pinelands, hammocks, pine-oak woods, scrub forests and coastal woodlands, warm and moist open forests |
| <i>Z. furfuracea</i> L. f.                        | Zamiaceae | ZF   | Mexico                                | Coastal savannas, coastal sand dunes and offshore islands                                                  |
| <i>Z. integrifolia</i> L. f.                      | Zamiaceae | ZI   | Cuba, Porto Rico, Cayman Islands, USA | Dry pinelands or dry oak woods, usually in sand or marl (coral rock), also in hammocks                     |
| <i>Z. splendens</i> Schutzman                     | Zamiaceae | ZS   | Mexico                                | Moist tropical rainforests                                                                                 |
| <i>Z. vazquezii</i> D. W. Stev., Sabato & De Luca | Zamiaceae | ZV   | Mexico                                | Moist semi-evergreen forests to pine-oak forests                                                           |

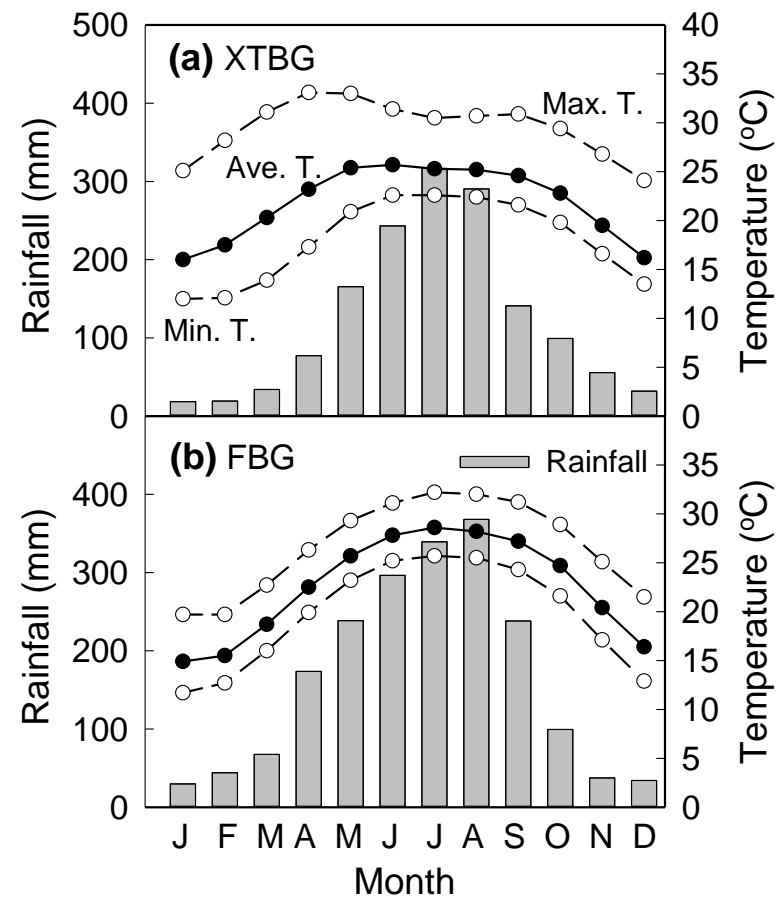

**Figure S1.** Mean monthly rainfall (bars), average maximum, minimum, and mean temperatures, in (a) Xishuangbanna Tropical Botanical Garden and (b) Fairylake Botanical Garden (Data from Xishuangbanna Tropical Rainforest Ecosystem Station and Shenzhen Weather Station).



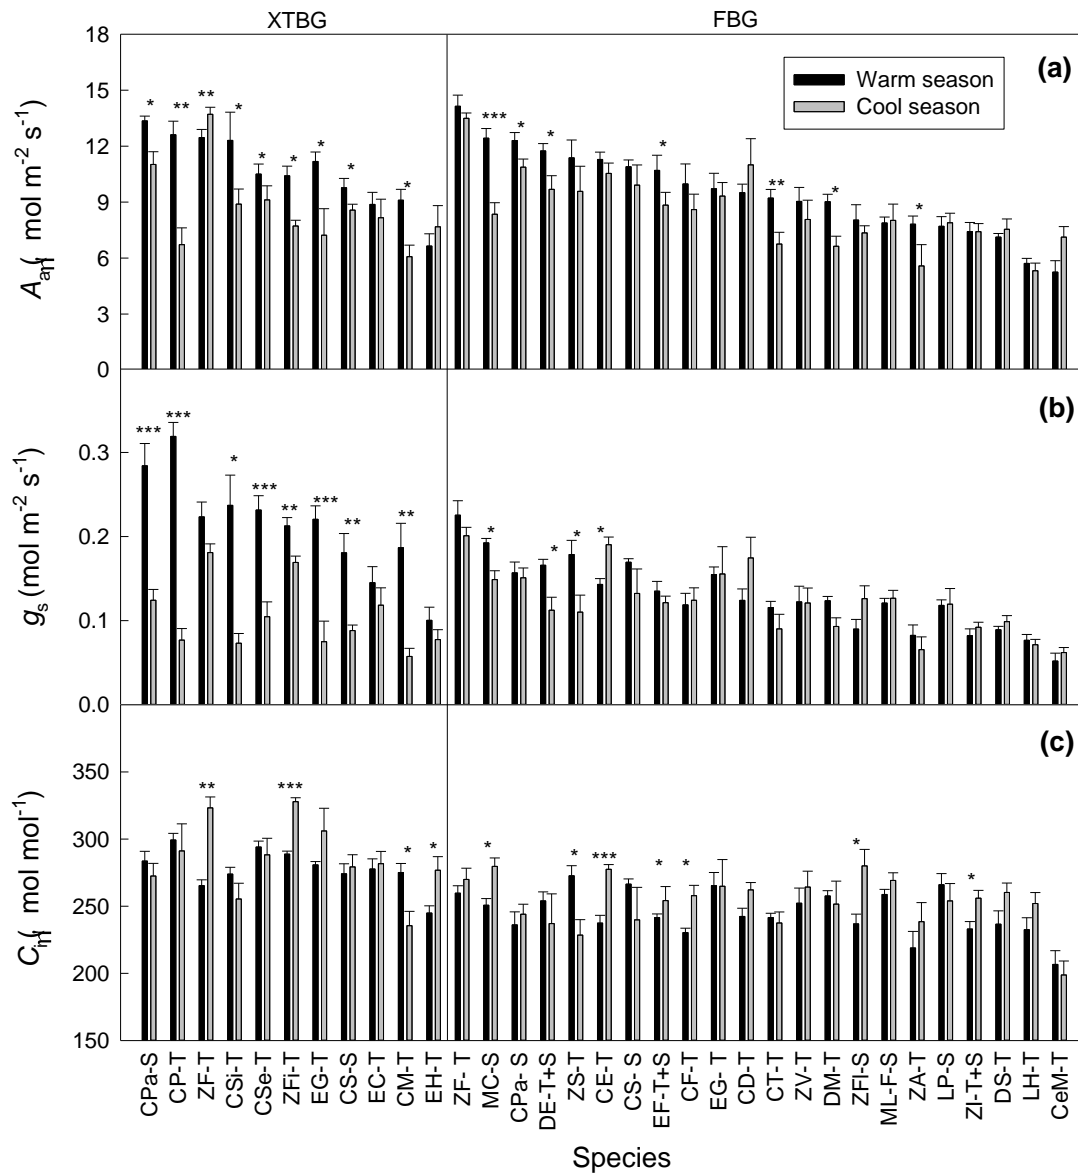

**Figure S2.** Net photosynthetic rates ( $A_a$ ), stomatal conductance ( $g_s$ ) and intercellular  $\text{CO}_2$  concentration ( $C_i$ ) of different cycad species in warm season and cool season. The letters followed species codes denote the distribution zone (T- Tropics; F- Subtropics). Bars are means + SE. \*  $P < 0.05$ ; \*\*  $P < 0.01$ ; \*\*\*  $P < 0.001$ . Species codes are in Table S2.

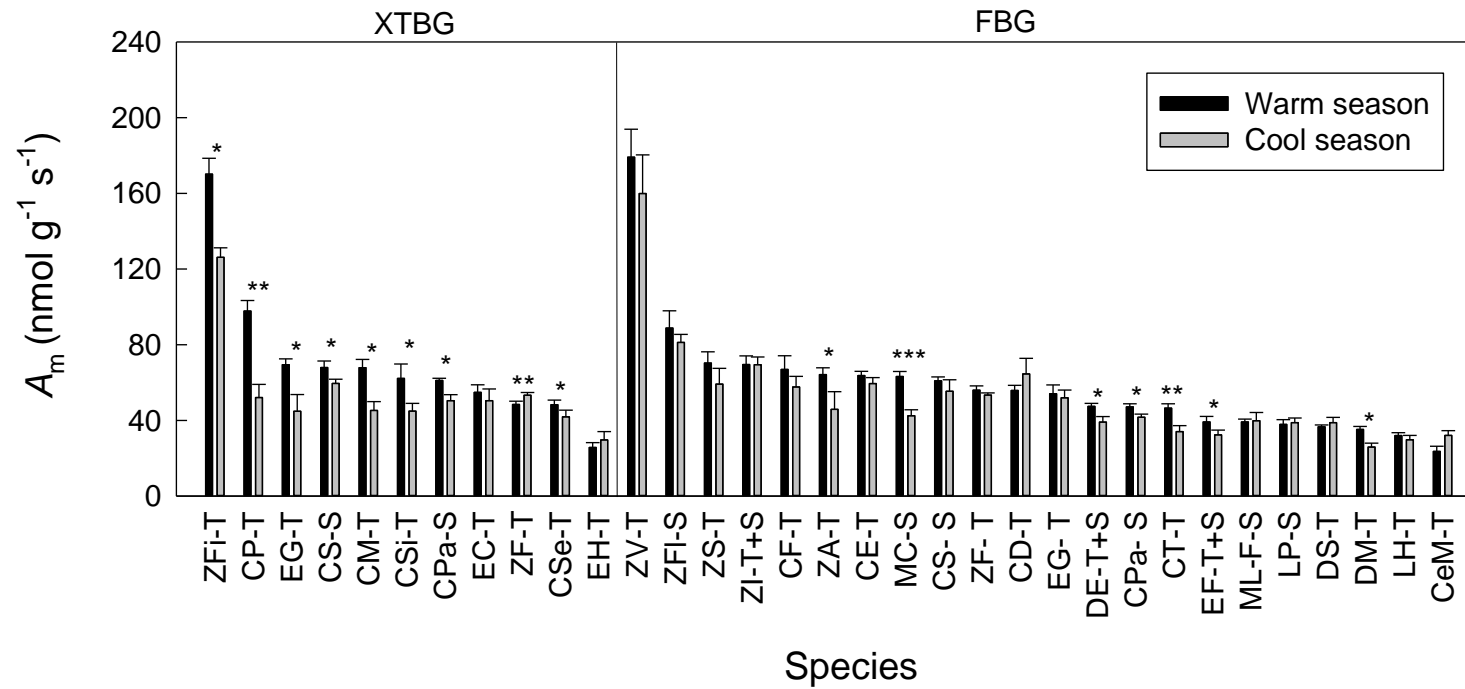

**Figure S3** Light-saturated net photosynthetic rate per leaf dry mass ( $A_m$ ) of different cycad species and averages of two different gardens in the warm season and cool season. The letters followed species codes denote the distribution zone (T- Tropics; F- Subtropics). Bars are Means + SEs. \*  $P < 0.05$ ; \*\*  $P < 0.01$ ; \*\*\*  $P < 0.001$ . Species codes are in Table S2.

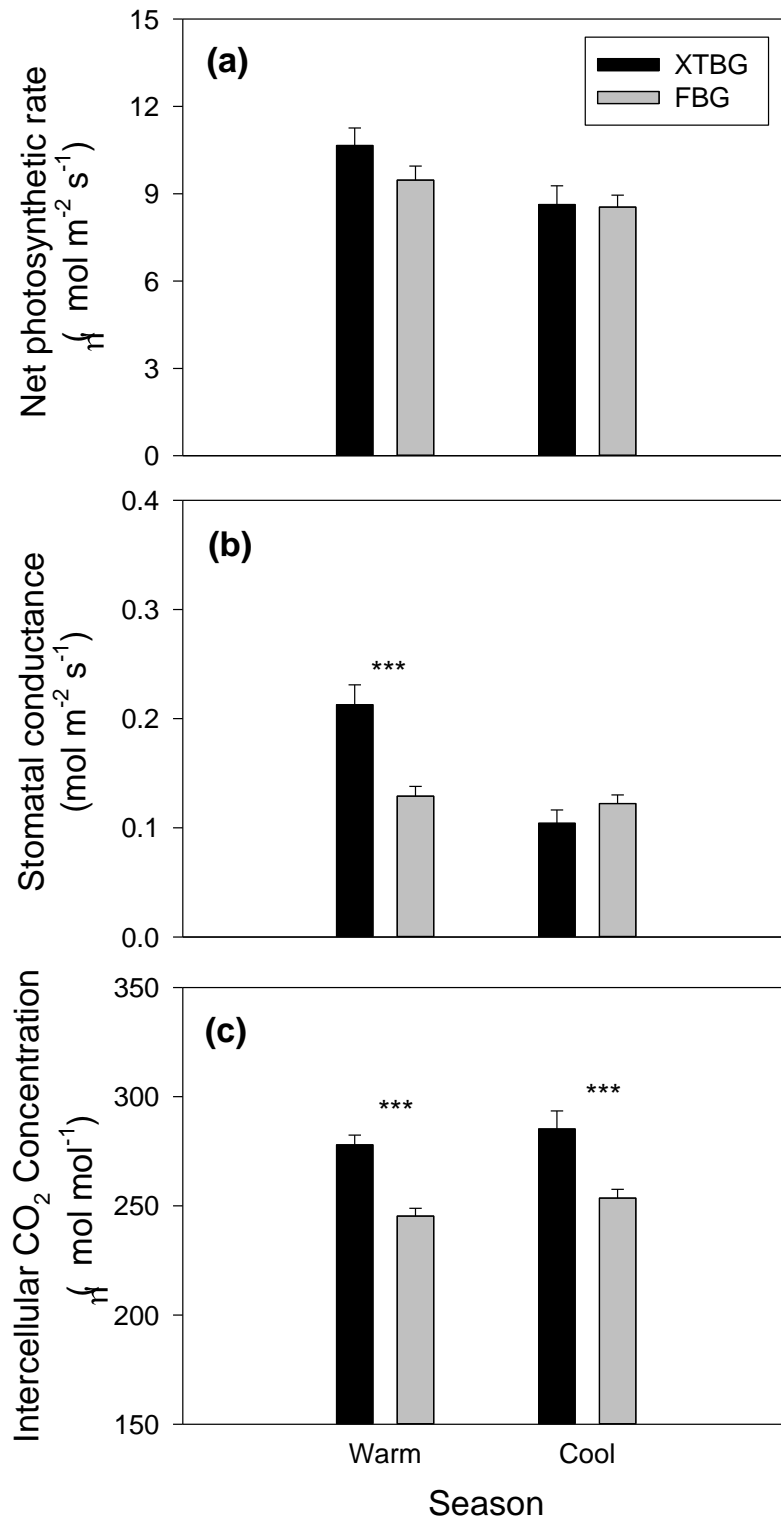

**Figure S4** Differences in average light-saturated net photosynthetic rate per area, stomatal conductance, and intercellular  $\text{CO}_2$  concentration between two different gardens in the warm and cool season. Means + SEs. \*\*\* indicate a significant difference between gardens ( $P < 0.001$ ).

## **Additional discussion on differences between two gardens**

The tradeoff between maximum performance and seasonal maintenance held across the two common garden study sites, but some trait relationships shifted. The difference in leaf stomatal conductance ( $g_s$ ) and maximum photosynthetic rate per area ( $A_a$ ) of the cycads between warm and cool seasons was smaller at FBG than XTBG (Fig. S2), despite no difference in cool season performance between the gardens (Fig. S4). Warm season photosynthesis was lower at FBG due to greater limitation by high Vapor pressure deficit (VPD; see *Materials and Methods*), as indicated by significantly lower intercellular CO<sub>2</sub> concentrations ( $C_i$ ) values (Fig. S4c). The greater seasonal changes in gas exchange for XTBG led to a tighter tradeoff between maximum values of  $A_a$  and  $g_s$  and their seasonal maintenance (Fig. 2b; Fig. 3a). This greater limitation of warm season gas exchange resulting in smaller range in seasonal changes in  $A$  likely impeded resolution of any linkage between seasonal decrease in maximum photosynthetic rate per mass ( $A_m$ ) and leaf mass per area (LMA) or leaf C/N ratio in FBG.

## Data source references

- Addington, R. N., Mitchell, R. J., Oren, R. & Donovan, L. A. (2004) Stomatal sensitivity to vapor pressure deficit and its relationship to hydraulic conductance in *Pinus palustris*. *Tree Physiology*, **24**, 561-569.
- Baquedano, F. J. & Castillo, F. J. (2007) Drought tolerance in the Mediterranean species *Quercus coccifera*, *Quercus ilex*, *Pinus halepensis*, and *Juniperus phoenicea*. *Photosynthetica*, **45**, 229-238.
- Ben Ahmed, C., Ben Rouina, B. & Boukhris, M. (2007) Effects of water deficit on olive trees cv. Chemlali under field conditions in and region in Tunisia. *Scientia Horticulturae*, **113**, 267-277.
- Binder, W. D. & Fielder, P. (1996) Seasonal changes in chlorophyll fluorescence of white spruce seedlings from different latitudes in relation to gas exchange and winter storability. *New Forests*, **11**, 207-232.
- Ellsworth, D. S. (2000) Seasonal CO<sub>2</sub> assimilation and stomatal limitations in a *Pinus taeda* canopy. *Tree Physiology*, **20**, 435-445.
- Falge, E., Graber, W., Siegwolf, R. & Tenhunen, J. D. (1996) A model of the gas exchange response of *Picea abies* to habitat conditions. *Trees-Structure and Function*, **10**, 277-287.
- Flexas, J., Gulias, J., Jonasson, S., Medrano, H. & Mus, M. (2001) Seasonal patterns and control of gas exchange in local populations of the Mediterranean evergreen shrub *Pistacia lentiscus* L. *Acta Oecologica*, **22**, 33-43.
- Gimeno, T. E., Camarero, J. J., Granda, E., Pias, B. & Valladares, F. (2012) Enhanced growth of *Juniperus thurifera* under a warmer climate is explained by a positive carbon gain under cold and drought. *Tree Physiology*, **32**, 326-336.
- Gul ás, J., Cifre, J., Jonasson, S., Medrano, H. & Flexas, J. (2009) Seasonal and inter-annual variations of gas exchange in thirteen woody species along a climatic gradient in the Mediterranean island of Mallorca. *Flora*, **204**, 169-181.
- Llorens, L., Penuelas, J. & Estiarte, M. (2003) Ecophysiological responses of two Mediterranean shrubs, *Erica multiflora* and *Globularia alypum*, to experimentally drier and warmer conditions. *Physiologia Plantarum*, **119**, 231-243.
- Maseyk, K. S., Lin, T., Rotenberg, E., Gruenzweig, J. M., Schwartz, A. & Yakir, D. (2008) Physiology-phenology interactions in a productive semi-arid pine forest. *New Phytologist*, **178**, 603-616.
- Miyazawa, Y. & Kikuzawa, K. (2005) Winter photosynthesis by saplings of evergreen broad-leaved trees in a deciduous temperate forest. *New Phytologist*, **165**, 857-866.
- Murthy, R., Zarnoch, S. J. & Dougherty, P. M. (1997) Seasonal trends of light-saturated net photosynthesis and stomatal conductance of loblolly pine trees grown in contrasting environments of nutrition, water and carbon dioxide. *Plant Cell and Environment*, **20**, 558-568.
- Ogaya, R. & Penuelas, J. (2003) Comparative seasonal gas exchange and chlorophyll fluorescence of two dominant woody species in a Holm Oak Forest. *Flora*, **198**, 132-141.
- Pardos, M., Puertolas, J., Madrigal, G., Garriga, E., de Blas, S. & Calama, R. (2010) Seasonal changes in the physiological activity of regeneration under a natural light gradient in a *Pinus pinea* regular stand. *Forest Systems*, **19**, 367-380.
- Peters, J., Gonzalez-Rodriguez, A. M., Jimenez, M. S., Morales, D. & Wieser, G. (2008) Influence of canopy position, needle age and season on the foliar gas exchange of *Pinus canariensis*. *European Journal of Forest Research*, **127**, 293-299.
- Prieto, P., Penuelas, J., Llusia, J., Asensio, D. & Estiarte, M. (2009) Effects of long-term experimental night-time warming and drought on photosynthesis, Fv/Fm and stomatal

*Supplementary Information*

- conductance in the dominant species of a Mediterranean shrubland. *Acta Physiologiae Plantarum*, **31**, 729-739.
- Strand, M., Lundmark, T., Soderbergh, I. & Mellander, P. E. (2002) Impacts of seasonal air and soil temperatures on photosynthesis in Scots pine trees. *Tree Physiology*, **22**, 839-847.
- Tang, Z. M., Chambers, J. L., Sword, M. A. & Barnett, J. P. (2003) Seasonal photosynthesis and water relations of juvenile loblolly pine relative to stand density and canopy position. *Trees-Structure and Function*, **17**, 424-430.
- Ward, S. J. E., Esler, K. J., Rundel, P. W. & Sherwin, H. W. (1999) A preliminary study of the responsiveness to seasonal atmospheric and rainfall patterns of wash woodland species in the arid Richtersveld. *Plant Ecology*, **142**, 149-160.
- Yoshie, F. & Kawano, S. (1986) Seasonal-Changes in Photosynthetic Characteristics of *Pachysandra-Terminalis* (Buxaceae), an Evergreen Woodland Chamaephyte, in the Cool Temperate Regions of Japan. *Oecologia*, **71**, 6-11.
